# Supplementary material for: High-quality single-walled carbon nanotube films as current collectors for flexible supercapacitors
Source: Royal Society of Chemistry journal article supplement (doi:10.1039/d2ta09396k), 2023-01-01
Supplement: d2ta09396k1.pdf [file d2ta09396k1.pdf]

**10th anniversary themed issue for Journal of Materials Chemistry A**

Supporting Information

**High-quality single-walled carbon nanotube films as ultralight current collectors for flexible supercapacitors**

Sheng Zhu, Zeyao Zhang,\* Jian Sheng, Guodong Jia, Jiangfeng Ni,\* and Yan Li\*

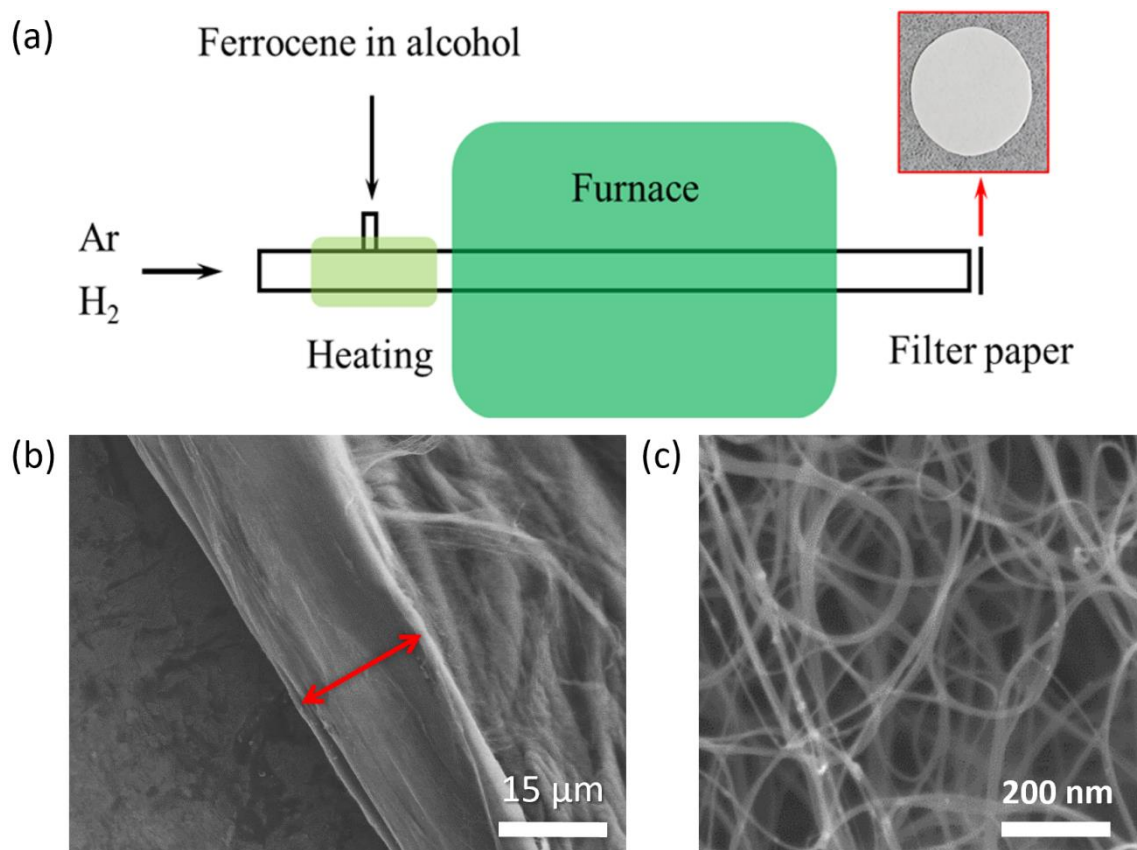

**Figure S1.** (a) Schematic experimental setup for synthetic process of the SWCNFs. (b) Cross-sectional SEM image of SWCNFs. (c) TEM image of SWCNFs.

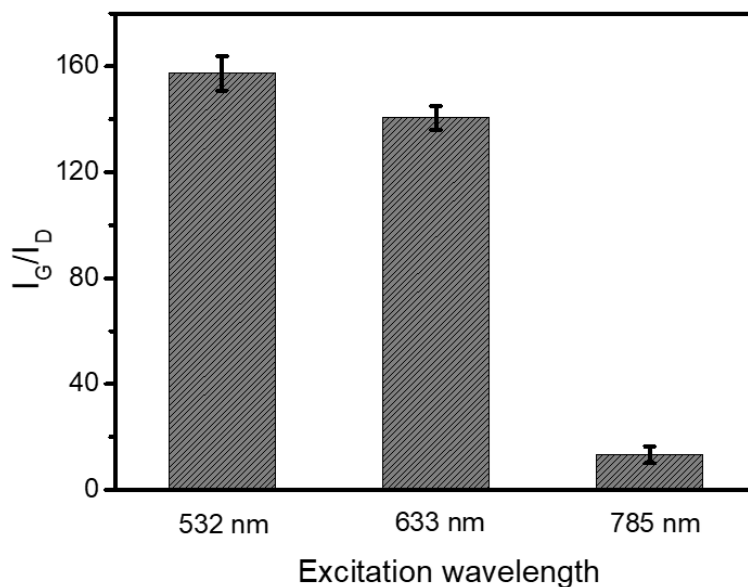

**Figure S2.**  $I_G/I_D$  values calculated from Raman spectra with the excitation wavelength of 532 nm, 633 nm and 785 nm.

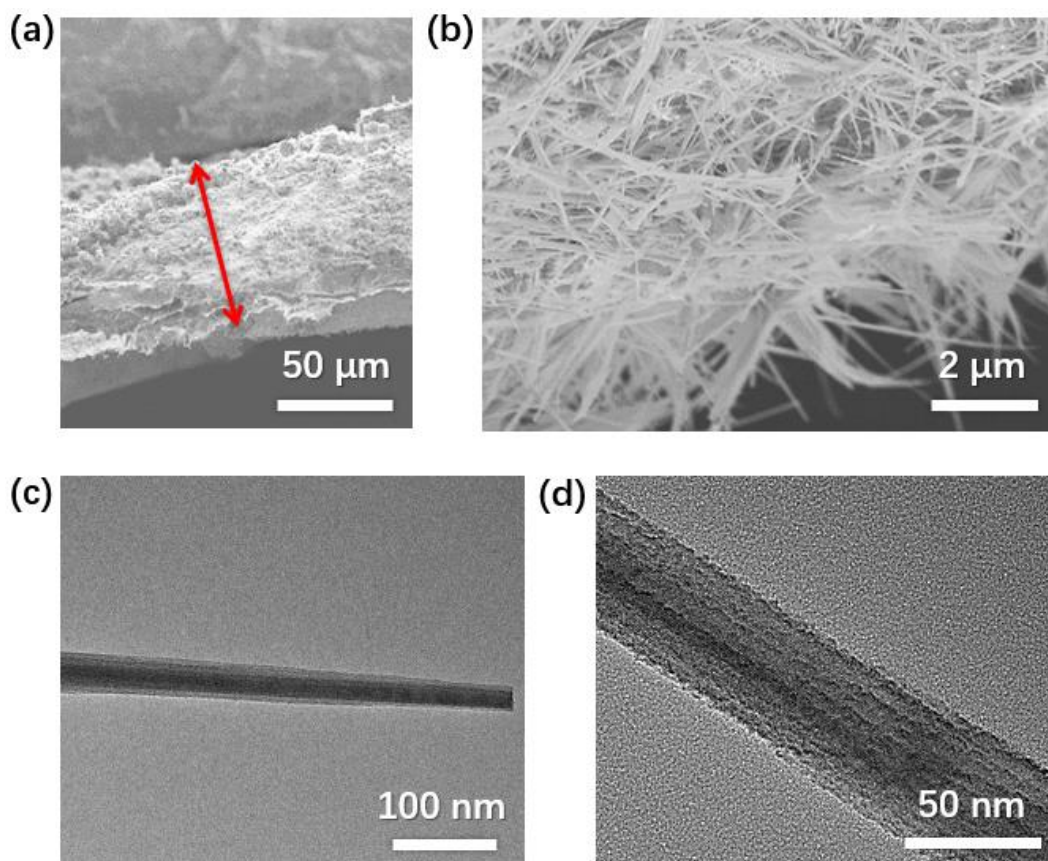

**Figure S3.** (a, b) Cross-sectional SEM images of SWCNF-CCH. (c, d) TEM images of a CCH nanowire. CCH: cobalt (II) carbonate hydroxide ( $\text{CO}_2(\text{OH})_2\text{CO}_3$ )

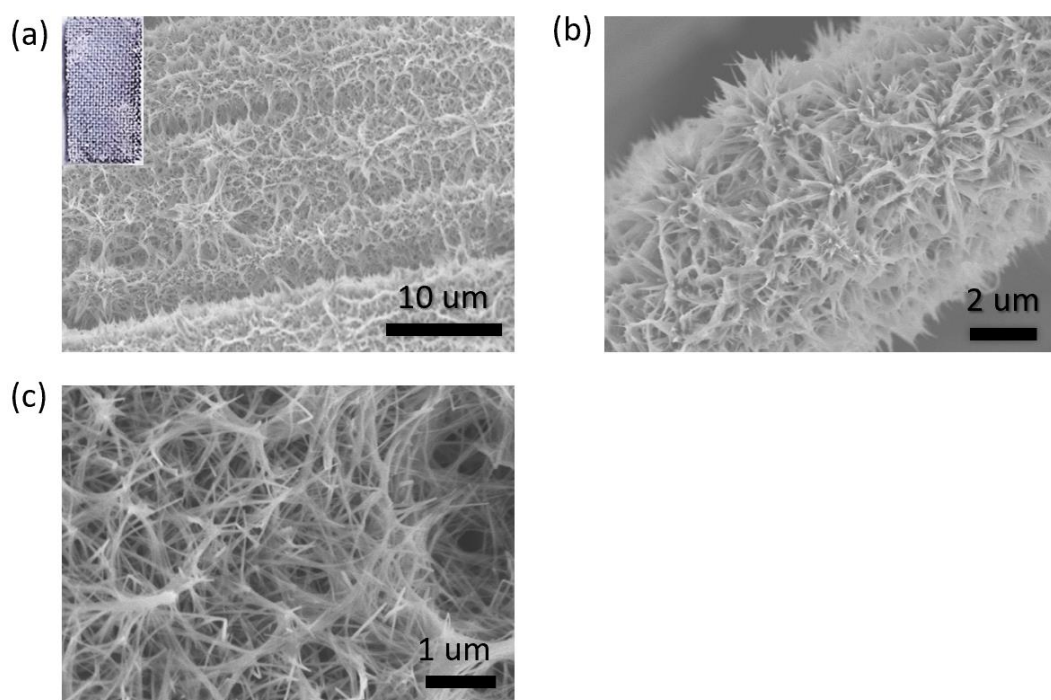

**Figure S4.** SEM images of carbon cloth-CCH.

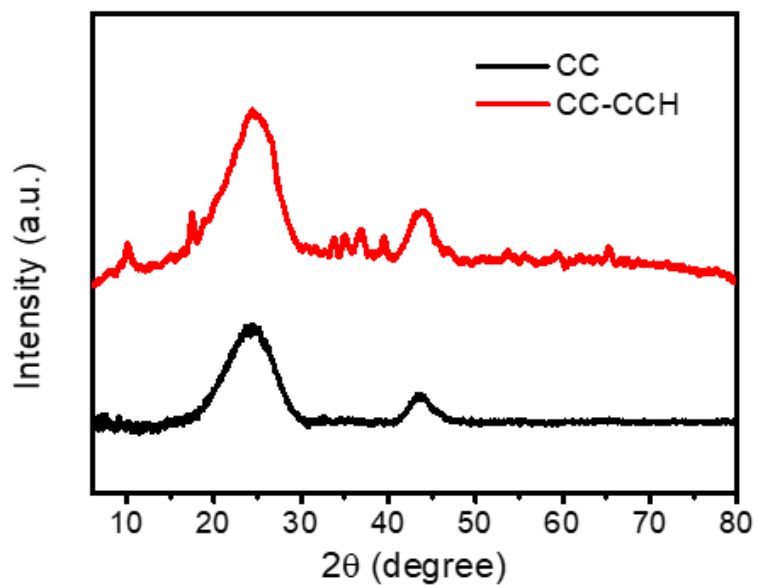

**Figure S5.** XRD of carbon cloth-CCH.

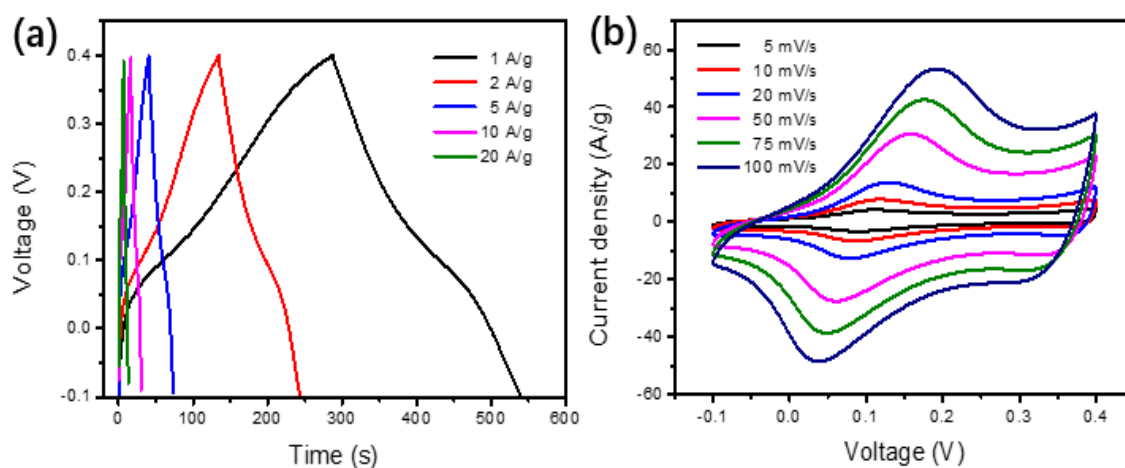

**Figure S6.** (a) GCD curves of carbon cloth-CCH under different current densities. (b) CV curves of carbon cloth-CCH at various scan rates.

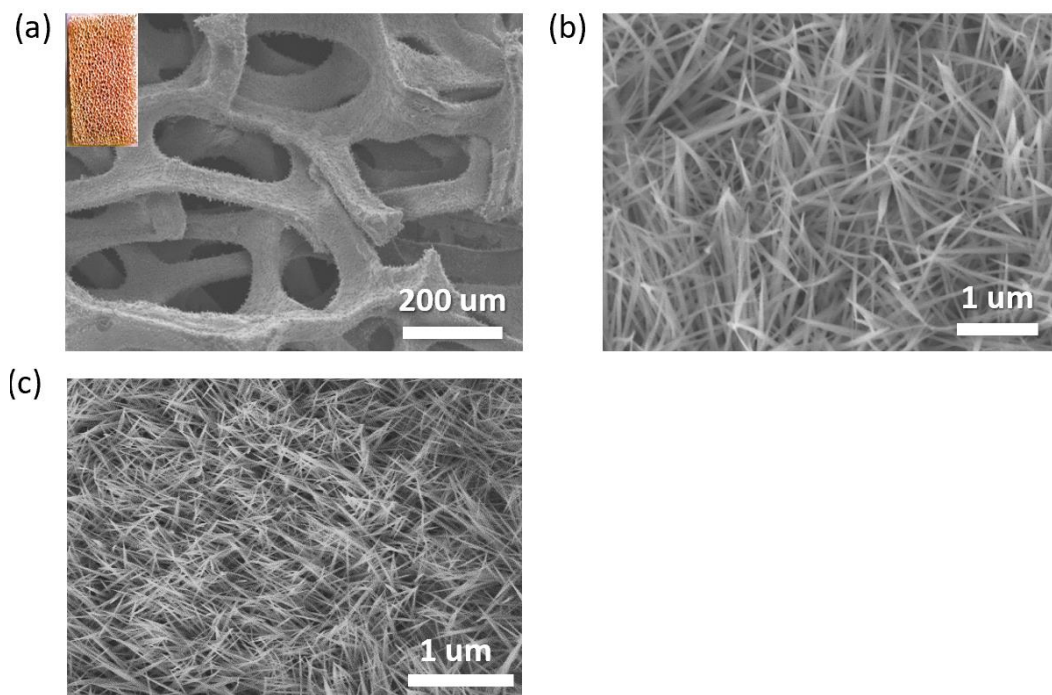

**Figure S7.** SEM images of Ni foam-CCH.

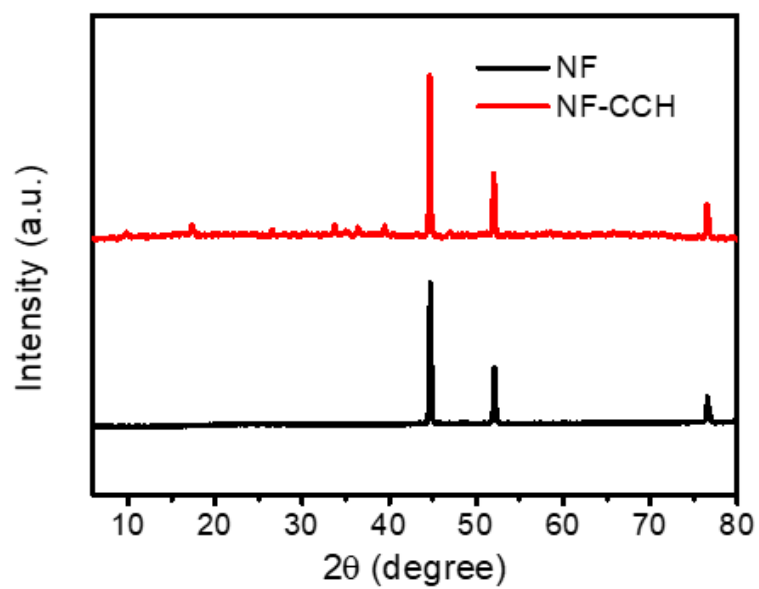

**Figure S8.** XRD of Ni foam-CCH.

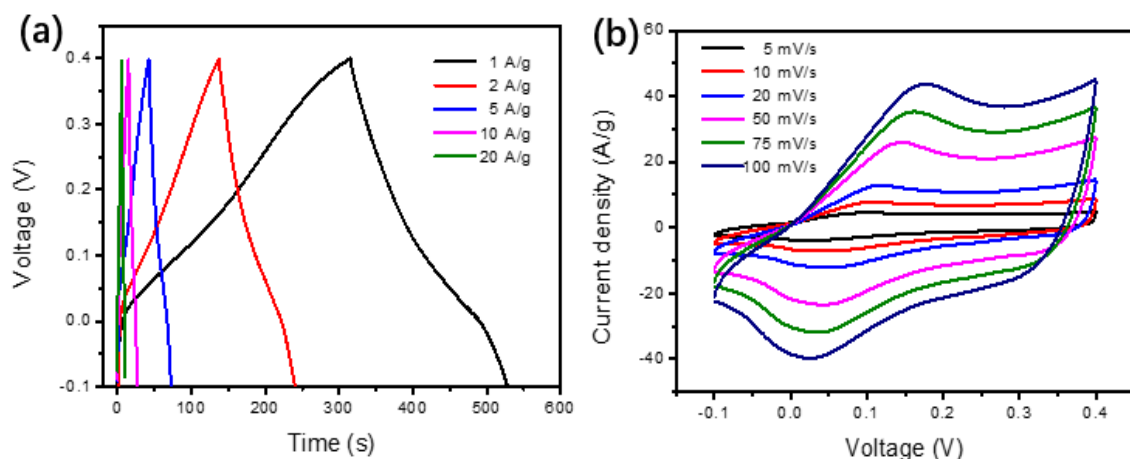

**Figure S9.** (a) GCD curves of Ni foam-CCH under different current densities. (b) CV curves of Ni foam-CCH at various scan rates.

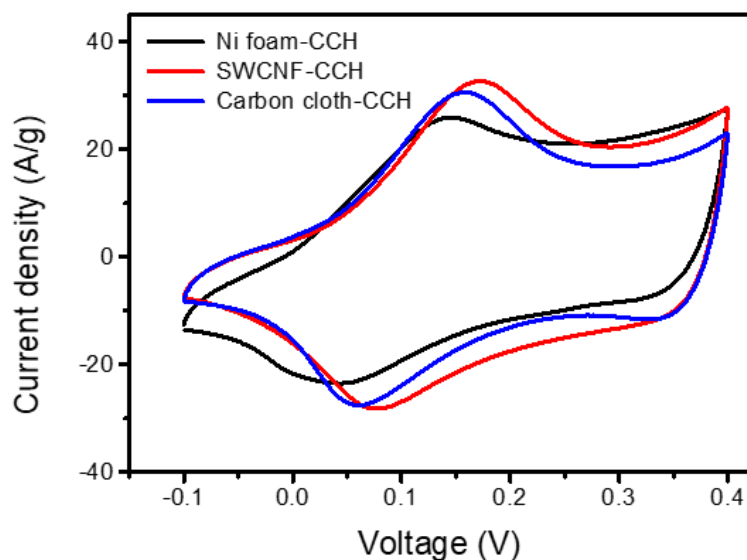

**Figure S10.** CV curves of CCH loaded on different current collectors.

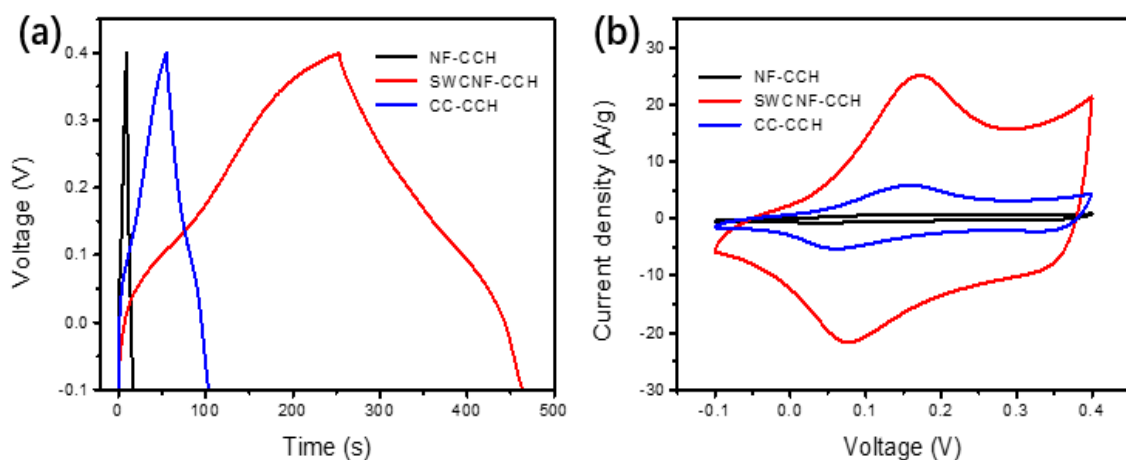

**Figure S11.** Consider the mass of CCH and current collectors. (a) GCD curves of CCH loaded on different current collectors. (d) CV curves of CCH loaded on different current collectors.

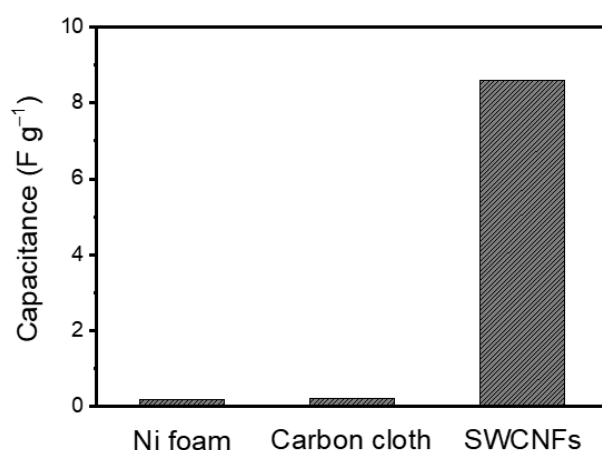

**Figure S12.** Specific capacitances of pure current collectors including Ni foam, carbon cloth, and SWCNFs.

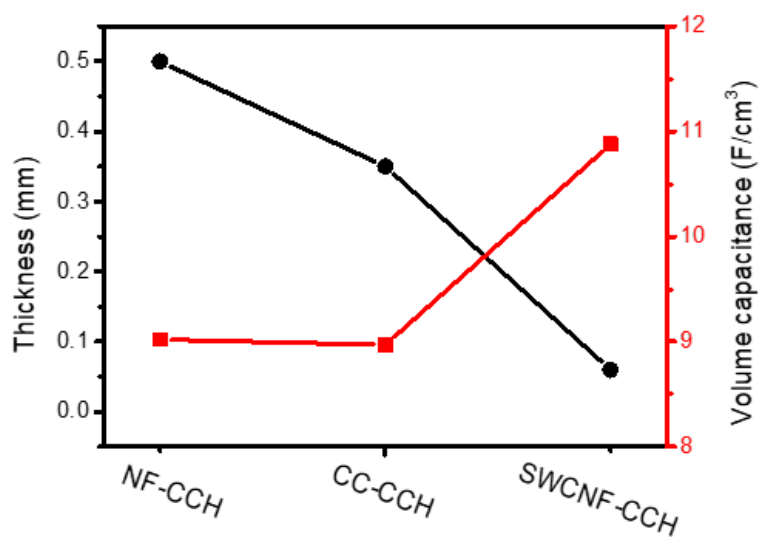

**Figure S13.** Thickness of different current collectors and the volume capacitance of CCH loaded on different current collectors when consider the total mass of CCH and current collectors.

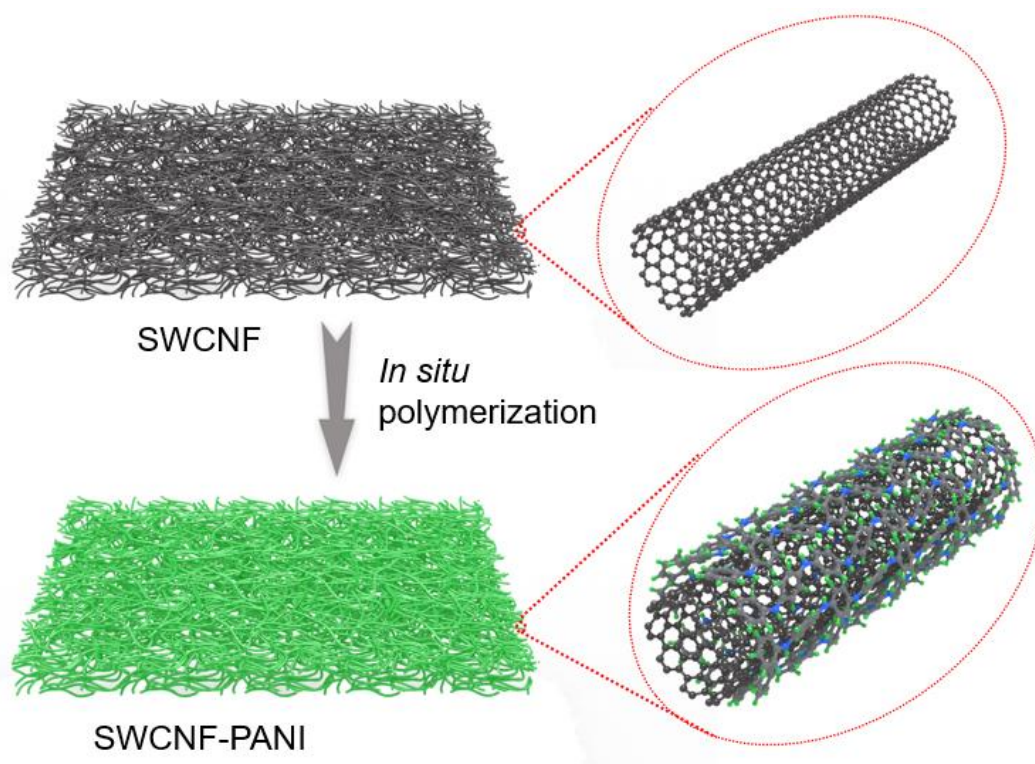

**Figure S14.** Schematic illustration for synthetic process of SWCNF-PANI.

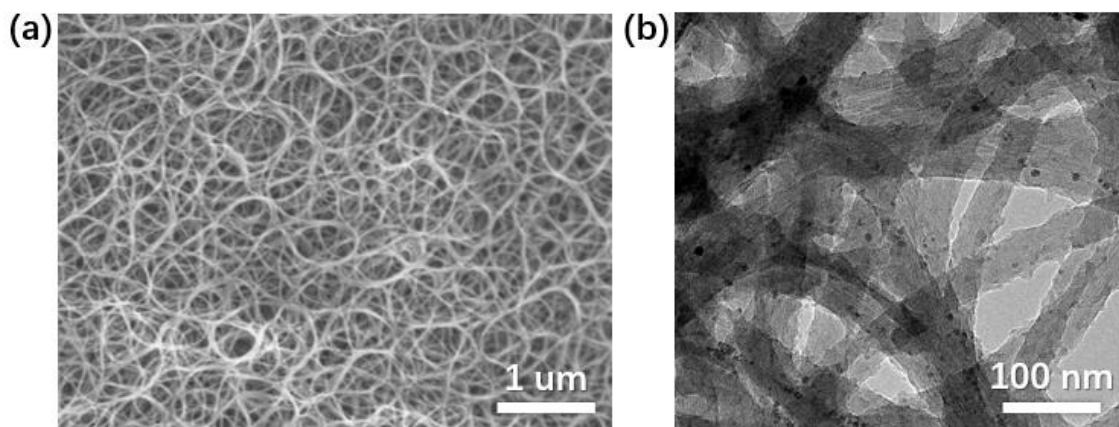

**Figure S15.** (a) SEM image of SWCNF-PANI. (b) TEM image of SWCNF-PANI.

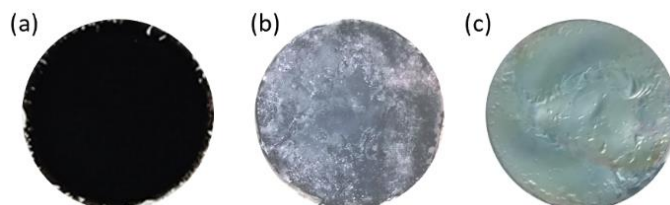

**Figure S16.** Optical images of SWCNT, SWCNT- $\text{Co}_2(\text{OH})_2\text{CO}_3$  and SWCNT-PANI.



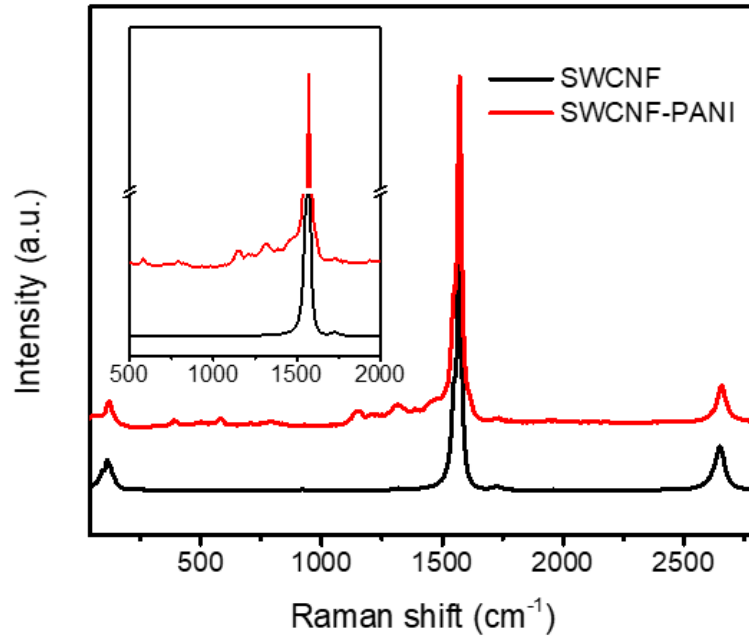

**Figure S17.** Raman spectrum of SWCNF and SWCNF-PANI.

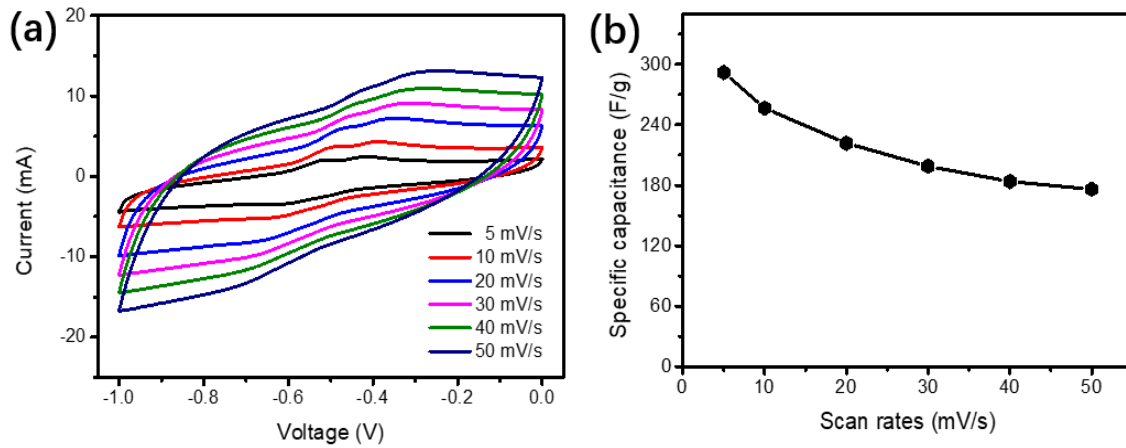

**Figure S18.** (a) CV curves of SWCNF-PANI. (b) Capacitance retention of SWCNF-PANI at various scan rates.

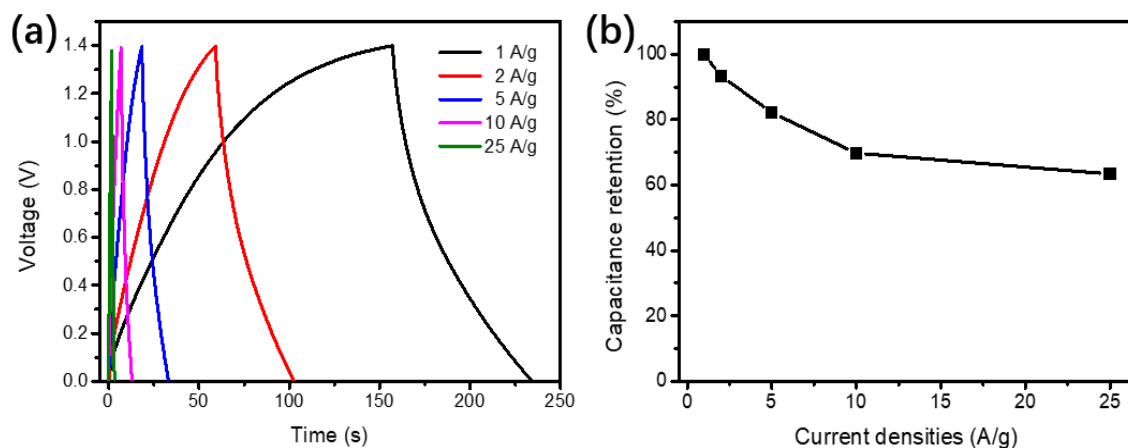

**Figure S19.** (a) GCD curves of SWCNF-CCH//SWCNF-PANI hybrid FSSCs. (b) Capacitance retention of SWCNF-CCH//SWCNF-PANI hybrid FSSCs at various scan rates.

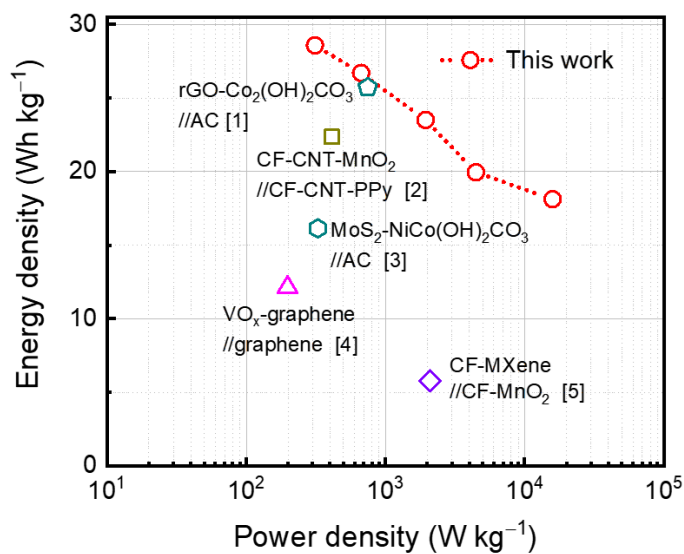

**Figure S20.** Comparison of Ragone plots of SWCNF-CCH//SWCNF-PANI hybrid FSSC with other reported devices.

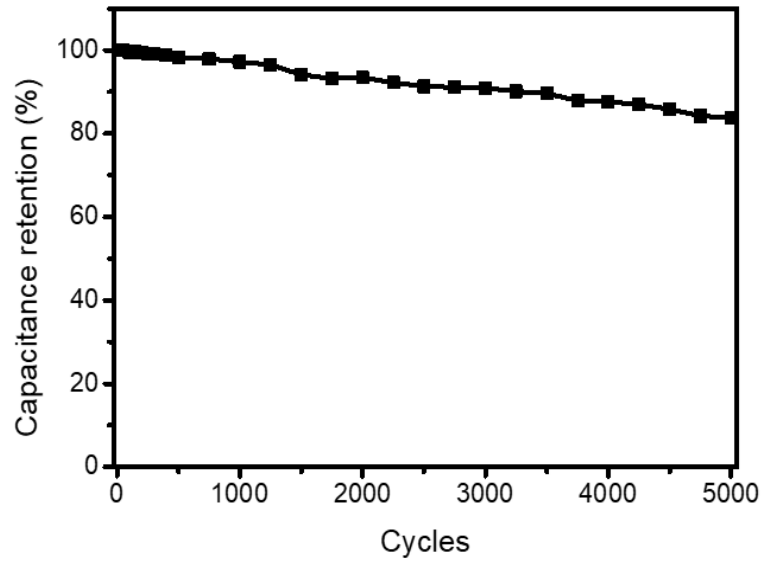

**Figure S21.** Cycling performance of SWCNF-CCH//SWCNF-PANI hybrid FSSCs.

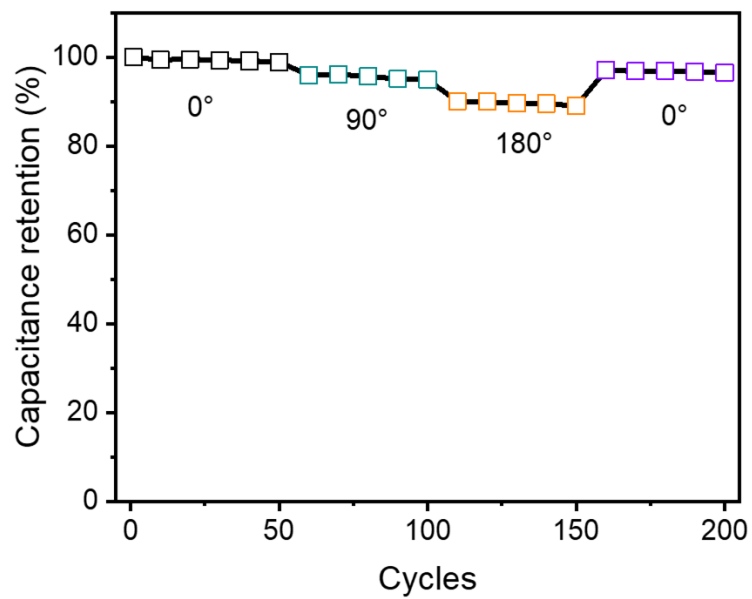

**Figure S22.** Cycling performance of SWCNF-CCH//SWCNF-PANI hybrid FSSCs under various bending conditions.

## References

1. X. Leng, L. Wu, Y. Liu, C. Li, S. Wei, Z. Jiang, G. Wang, J. Lian and Q. Jiang, *J. Mater. Chem. A*, 2016, **4**, 17171-17179.
2. T. Cen, L. Chen, X. Zhang, Y. Tian, X. Fan, *Electrochim. Acta*, 2021, **367**, 137488.
3. A.Y. Chen, H.H. Liu, P. Qi, X.F. Xie, M.T. Wang and X.Y. Wang, *J. Alloy. Compd.*, 2021, **864**, 158144.
4. A.-Y. Wang, M. Chaudhary and T.-W. Lin, *Chem. Eng. J.*, 2019, **355**, 830-839.
5. Y. Wei, M. Zheng, W. Luo, B. Dai, J. Ren, M. Ma, T. Li and Y. Ma, *J. Energy Storage*, 2022, **45**, 103715.
